# Supplementary material for: Breeding French bulldogs so that they breathe well—A long way to go
Source: PLoS One. 2019 Dec 16;14(12):e0226280. doi: 10.1371/journal.pone.0226280 (PMC6913956; doi:10.1371/journal.pone.0226280)
Supplement: S2 Table — (XLSX) [file pone.0226280.s002.xlsx]

## Sheet: Ark1
Number	pre_respiratory_distress	pre_pulse	pre_rr	pre_temperature	pre_ausc_heart	pre_ausc_pulmones	pre_ausc_trachea	pre_aud_upperairway	pre_decibel	post_respiratory_distress	post_pulse	post_rr	post_temperature	post_ausc_heart	post_ausc_pulmones	post_ausc_trachea	post_aud_upperairway	post_decibel	post15_respiratory_distress	post15_pulse	post15_rr	post15_temperature	post15_ausc_heart	post15_ausc_pulmones	post15_ausc_trachea	post15_aud_upperairway	post15_decibel	aud_upperairway_6MWT	Cyanosis_or_collapse	BSFscore_0_32
1	0	88	24	39.2	0	1	1	1	0	0	94	40	39.2	0	0	1	1	0	0	88	20	39.2	0	0	1	0	0	1	0	7
2	0	112	28	38.6	0	0	0	0	0	0	128	52	39.1	0	0	0	0	0	0	128	28	39.1	0	0	0	0	0	0	0	0
3	0	76	20	38.1	0	1	1	1	0	0	100	28	38.6	0	1	1	1	0	0	80	20	38.2	0	2	2	2	0	2	0	14
5	0	112	52	39.2	0	0	1	1	0	0	116	64	39.4	0	1	1	0	0	0	128	144	39.3	0	0	1	0	0	0	0	5
6	0	96	124	38.8	0	1	1	1	1	1	124	200	38.4	0	1	1	1	1	0	128	92	38.6	0	1	1	1	1	1	0	14
7	0	88	32	38.7	0	1	1	1	0	0	104	84	39.2	0	1	1	1	1	0	100	164	39	0	1	1	1	1	1	0	12
8	0	72	36	38.5	0	0	1	1	1	1	104	24	38.9	0	0	1	1	1	0	100	24	39	0	2	2	2	1	2	0	16
9	0	104	32	38.7	0	1	1	1	1	0	108	36	38.7	0	1	1	1	1	0	92	24	38.8	0	1	1	1	1	2	0	14
10	0	104	32	39.1	0	1	1	2	1	0	108	28	39	0	1	1	2	1	0	80	20	39.4	0	2	1	2	1	2	1	18
11	0	88	28	38.9	0	1	1	2	1	0	152	108	39.4	0	1	1	2	1	0	60	146	38.9	0	2	1	2	0	2	0	17
12	0	100	28	38.6	0	1	2	1	0	0	82	28	39.1	0	1	1	1	1	0	80	24	38.8	0	1	1	1	0	1	0	12
13	0	124	44	38.9	0	1	1	2	0	0	120	132	39.1	0	1	1	1	0	0	128	160	39	0	1	1	1	1	2	0	13
14	0	88	36	38.8	0	0	0	0	0	0	112	56	39	0	0	0	0	0	0	112	36	38.8	0	0	0	0	0	0	0	0
15	0	160	152	39.2	0	2	2	2	2	1	108	160	39.4	0	2	2	2	1	0	160	200	39.2	0	2	2	2	1	2	0	25
16	0	128	120	39.1	0	1	1	1	1	0	112	20	39.2	0	1	1	1	0	0	100	20	38.7	0	1	1	1	0	1	0	11
17	0	100	24	39.1	0	2	2	2	1	0	140	104	39.2	0	2	2	2	1	0	108	24	39	0	1	1	2	0	2	0	20
18	0	104	20	38.2	0	1	1	1	0	0	100	20	39	0	1	1	1	0	0	100	28	38.9	0	1	1	1	0	1	1	10
19	0	96	20	38.8	0	0	0	1	0	0	109	160	39.2	0	0	0	0	0	0	100	36	38.4	0	0	0	0	0	0	0	1
20	0	136	136	39.2	0	2	2	2	1	1	140	168	39.7	0	2	2	2	1	1	120	160	39.4	0	2	2	2	1	2	0	25
21	0	120	39	38.7	0	1	1	1	0	0	100	204	39	0	1	1	1	1	0	140	90	38.8	0	1	1	1	0	1	0	11
22	0	132	36	38.6	0	1	1	1	0	0	126	188	38.9	0	1	1	1	0	0	100	120	38.4	0	1	1	0	0	1	0	9
23	0	136	36	38.7	0	2	2	2	0	0	148	52	38.7	0	2	2	2	0	0	102	54	38.6	0	2	2	2	0	2	0	20
24	0	120	24	37.9	0	2	2	2	0	0	90	30	38.4	0	2	2	2	0	0	112	20	38.3	0	1	1	2	0	2	0	18
25	0	116	42	38.7	0	1	1	1	0	0	136	90	38.6	0	1	1	1	0	0	102	30	38.9	0	1	1	0	0	0	0	8
26	0	128	36	38.9	0	1	1	1	0	0	136	120	39.2	0	1	1	1	0	0	148	56	39.2	0	1	1	1	0	1	0	10
27	0	102	16	38.5	0	0	0	0	0	0	104	28	38.5	0	0	0	0	0	0	92	28	38.6	0	0	0	0	0	0	0	0
28	0	126	24	38.9	0	0	0	1	0	0	116	24	39.2	0	0	0	0	0	0	96	28	39.1	0	0	0	0	0	0	0	1
29	0	140	40	39	0	1	1	1	0	0	124	112	38.9	0	1	2	1	0	0	124	88	38.7	0	1	2	2	0	1	0	13
30	0	112	28	38.2	0	1	1	1	0	0	120	96	38.4	0	2	2	1	0	0	92	28	38.1	0	1	2	1	0	1	0	13
31	0	80	16	38.8	0	1	2	2	0	0	104	20	38.9	0	1	1	1	0	0	92	68	39	0	0	1	1	0	1	0	11
32	0	116	44	39.1	0	1	2	1	0	0	116	28	39.2	0	1	2	1	0	0	104	24	38.9	0	0	2	1	0	1	0	12
33	0	104	40	38.3	0	0	2	1	0	0	120	128	38.9	0	0	2	1	0	0	92	40		0	0	2	1	0	1	0	10
34	0	116	32	38.8	0	1	1	1	0	0	128	228	39.4	0	1	2	1	0	0	72	144	39	0	1	2	1	0	1	1	12
35	0	120	72	38.8	0	1	2	1	0	0	120	192	39.2	0	1	1	1	0	0	96	168	38.9	0	0	0	1	0	1	0	9
36	0	116	36	38.8	0	2	2	2	0	0	132	252	38.9	0	2	2	2	0	0	112	48	38.4	0	1	1	1	0	2	0	17
37	0	116	32	39.1	0	1	1	1	0	0	150	138	39.1	0	1	1	1	0	0	108	36	39	0	1	1	1	0	1	0	10
38	0	100	120	38.5	0	2	2	2	1	1	100	96	38.8	0	2	2	2	1	0	96	30	38.5	0	2	2	2	1	2	0	24
39	1	120	48	38.7	0	2	2	2	1	1	132	48	39	0	2	2	2	1	0	150	36	38.6	0	2	2	2	1	2	1	25
40	0	78	36	38.5	0	0	0	0	0	0	100	36	38.5	0	0	1	0	0	0	88	42	38.6	0	0	0	0	0	0	0	1
41	1	144	24	38.6	0	2	2	2	1	1	132	150	39.6	0	2	2	2	1	1	112	140	39	0	2	2	1	0	2	0	24
42	0	128	20	38.6	0	2	1	2	0	0	116	30	39.1	0	2	2	2	0	0	120	18	38.4	0	2	2	2	0	2	0	19
43	0	84	32	37.9	0	0	1	1	0	0	120	168	38.9	0	1	1	1	0	0	119	66	38.6	0	0	1	1	0	1	0	8
44	0	137	78	39.3	0	1	1	1	0	0	112	204	39.8	0	2	2	2	1	0	127	186	39.6	0	2	2	2	1	2	0	19
45	0	130	126	38.6	0	2	2	2	1	1	144	246	39.1	0	2	2	2	1	0	138	92	38.9	0	2	2	2	1	2	0	24
46	0	96	44	38.4	0	1	2	2	0	0	116	64	38.9	0	1	2	1	0	0	100	36	38.7	0	1	2	2	0	1	0	15
47	1	132	32	37.8	0	2	2	2	1	0	128	36	38.2	0	2	2	2	1	0		30	38	0	1	2	2	0	2	0	22
49	0	132	30	39.2	0	0	1	1	0	0	108	30	39.4	0	0	0	0	0	0	120	48	39.1	0	0	0	0	0	0	0	2
50	0	126	108	39.1	0	2	2	2	0	0	120	156	39.6	0	2	2	2	0	0	126	198	39.3	0	1	1	1	0	2	0	17
51	0	88	36	38.5	0	0	1	1	0	0	102	36	38.8	0	0	2	1	0	0	96	42	38.5	0	1	1	1	0	1	0	9
52	0	100	120	38.2	0	2	2	2	1	1	132	160	38.8	0	2	2	2	2	0	144	276	39.1	0	2	2	2	1	2	0	25
53	0	102	96	39.1	0	1	1	2	1	0	114	132	39.4	0	1	2	2	1	0	100	40	39.2	0	1	1	1	0	2	0	16
55	0	120	54	38.6	0	1	1	2	0	0	128	108	38.7	0	2	2	2	0	0	126	16	38.5	0	1	1	2	0	1	0	15
56	0	104	44	38.4	0	2	2	2	0	0	120	144	38.5	0	2	2	1	0	0	90	84	38.5	0	1	2	2	0	1	0	17
57	0	144	180	38.6	0	2	2	2	1	1	108	172	39.4	0	2	2	2	1	0	120	144	38.8	0	2	2	2	1	2	0	24
58	1	132	198	39.2	0	2	2	2	1	1	120	150		0	2	2	2	2	1	146	168		0	2	2	2	1	2	0	27
59	0	124	120	38.8	0	1	2	1	0	0	108	240	39.1	0	1	2	1	0	0	120	138	39	0	1	1	1	0	1	0	12
60	1	144	196	38.9	0	2	2	2	2	1	120	184	39.1	0	2	2	2	2	1	174	180	38.8	0	2	2	2	2	2	0	29
61	0	144	120	39	0	2	2	1	0	0	102	192	39.2	0	1	2	1	0	0	78	44	39	0	1	2	1	1	1	0	15
62	0	90	180	39.3	0	1	2	1	0	0	72	144	39.5	0	2	2	2	1	0	108	24	39.1	0	1	1	1	0	1	0	15
63	0	96	24	38.5	0	2	2	2	1	0	84	120	39.4	0	2	2	2	1	0	116	60	39.2	0	1	2	1	0	2	0	20
64	0	112	30	38.5	0	1	2	1	0	0	126	36	38.4	0	1	1	1	0	0	126	42	38.4	0	1	2	1	1	1	0	13
65	0	112	42	38.2	0	1	2	1	0	0	120	36	38.3	0	1	2	1	0	0	96	30	38.3	0	0	1	0	1	1	0	11
66	0	132	72	39	0	1	1	1	0	0	116	48	39	0	1	2	1	0	0	150	28	39	0	1	2	1	0	1	0	12
67	0	114	42	38.7	0	1	2	2	0	0	120	84	39.1	0	1	2	2	0	0	96	54	38.9	0	1	2	2	1	2	0	18
68	0	102	30	38.7	0	2	2	2	1	0	126	78	38.9	0	2	2	2	1	0	138	30	38.8	0	2	2	2	1	2	0	23
69	0	126	136	38.6	0	1	2	1	0	0	116	204	38.9	0	2	2	2	0	0	144	204	38.7	0	1	2	1	1	1	0	16
70	0	100	54	38.5	0	1	1	2	0	0	112	180	38.7	0	2	2	2	0	0	102	72	38.7	0	1	2	2	1	2	0	18
71	0	138	36	38.8	0	2	2	2	0	0	124	60	39.2	0	2	2	2	0	0	162	32	39	0	2	2	2	0	2	0	20
72	0	90	30	39.3	0	0	0	0	0	0	108	126	39.7	0	0	0	0	0	0	96	28	39.2	0	0	0	0	1	0	0	1
BSF score=brachycephalic functional score
